# Supplementary material for: Synthesis and structural characteristic of pyridine carboxylic acid adducts with squaric acid
Source: Royal Society of Chemistry journal article supplement (doi:10.1039/d2ce00760f), 2022-01-01
Supplement: d2ce00760f1.pdf [file d2ce00760f1.pdf]

## Supplementary Information

### Synthesis and structural characteristics of pyridine carboxylic acids adducts with squaric acid

Mateusz Gołdyn, Elżbieta Bartoszak-Adamska, Anna Komasa, Julia Skowronek, Aneta Lewandowska, Zofia Dega-Szafran, Grzegorz Cofa

**Table S1.** The experimental and calculated, by the APF-D/6-311++G(d,p) approach, bond lengths (Å), bond angles (°) and selected torsion angles (°) for the complexes of squaric acid with picolinic acid (**1**, **1a**), nicotinic acid (**2**, **2a**) and isonicotinic acid (**3**, **3a**).

|                     | PICA-SQA             |           | NICA-SQA             |           |                      | ISONICA-SQA          |           |                      |
|---------------------|----------------------|-----------|----------------------|-----------|----------------------|----------------------|-----------|----------------------|
|                     | Exp                  | Calc      | Exp                  | 2*        | Calc                 | Exp                  | 3*        | Calc                 |
|                     | <b>1</b>             | <b>1a</b> | <b>2</b>             | <b>2*</b> | <b>2a</b>            | <b>3</b>             | <b>3*</b> | <b>3a</b>            |
| <i>Bond lengths</i> |                      |           |                      |           |                      |                      |           |                      |
| N(1)–C(2)           | 1.369(5)             | 1.340     | 1.339(2)             | 1.335(2)  | 1.344                | 1.344(2)             | 1.345(2)  | 1.350                |
| C(2)–C(3)           | 1.368(5)             | 1.383     | 1.384(2)             | 1.383(2)  | 1.381                | 1.387(2)             | 1.388(2)  | 1.375                |
| C(3)–C(4)           | 1.383(5)             | 1.390     | 1.390(2)             | 1.387(2)  | 1.392                | 1.392(2)             | 1.389(2)  | 1.396                |
| C(4)–C(5)           | 1.384(5)             | 1.397     | 1.384(3)             | 1.380(3)  | 1.394                | 1.392(2)             | 1.395(2)  | 1.396                |
| C(5)–C(6)           | 1.376(5)             | 1.380     | 1.379(2)             | 1.369(2)  | 1.377                | 1.380(2)             | 1.381(2)  | 1.375                |
| C(6)–N(1)           | 1.344(4)             | 1.340     | 1.343(2)             | 1.347(2)  | 1.350                | 1.343(2)             | 1.340(2)  | 1.350                |
| C(2)–C(7)           | 1.505(4)             | 1.525     | –                    | –         | –                    | –                    | –         | –                    |
| C(3)–C(7)           | –                    | –         | 1.495(2)             | 1.488(2)  | 1.526                | –                    | –         | –                    |
| C(4)–C(7)           | –                    | –         | –                    | –         | –                    | 1.510(2)             | 1.503(2)  | 1.529                |
| C(7)–O(1)           | 1.253(3)             | 1.234     | 1.221(2)             | 1.235(2)  | 1.246                | 1.229(2)             | 1.227(2)  | 1.244                |
| C(7)–O(2)           | 1.259(3)             | 1.251     | 1.311(2)             | 1.294(2)  | 1.241                | 1.292(2)             | 1.295(2)  | 1.244                |
| C(11)–C(12)         | 1.397(4)             | 1.391     | 1.431(2)             | 1.425(2)  | 1.393                | 1.428(2)             | 1.429(2)  | 1.393                |
| C(12)–C(13)         | 1.458(5)             | 1.483     | 1.436(2)             | 1.422(2)  | 1.482                | 1.432(2)             | 1.429(2)  | 1.482                |
| C(13)–C(14)         | 1.525(5)             | 1.541     | 1.498(2)             | 1.497(2)  | 1.539                | 1.502(2)             | 1.505(2)  | 1.539                |
| C(14)–C(11)         | 1.473(5)             | 1.482     | 1.498(2)             | 1.493(2)  | 1.482                | 1.500(2)             | 1.503(2)  | 1.482                |
| C(11)–O(11)         | 1.289(4)             | 1.311     | 1.247(2)             | 1.258(2)  | 1.308                | 1.251(2)             | 1.252(2)  | 1.308                |
| C(12)–O(12)         | 1.312(4)             | 1.309     | 1.321(2)             | 1.314(2)  | 1.308                | 1.312(2)             | 1.316(2)  | 1.308                |
| C(13)–O(13)         | 1.228(4)             | 1.202     | 1.250(2)             | 1.253(2)  | 1.204                | 1.248(2)             | 1.244(2)  | 1.204                |
| C(14)–O(14)         | 1.213(4)             | 1.203     | 1.221(2)             | 1.217(2)  | 1.204                | 1.215(2)             | 1.215(2)  | 1.204                |
| *MAD                | <sup>a)</sup> 0.0139 |           | <sup>b)</sup> 0.0067 |           | <sup>c)</sup> 0.0239 | <sup>d)</sup> 0.0025 |           | <sup>e)</sup> 0.0022 |
| <i>Bond angles</i>  |                      |           |                      |           |                      |                      |           |                      |
| N(1)–C(2)–C(3)      | 119.2(4)             | 119.39    | 120.1(2)             | 119.7(2)  | 119.62               | 119.9(1)             | 119.8(1)  | 119.40               |
| C(2)–C(3)–C(4)      | 119.7(4)             | 118.51    | 118.7(2)             | 118.5(2)  | 118.74               | 118.6(2)             | 118.5(1)  | 119.24               |
| C(3)–C(4)–C(5)      | 120.2(5)             | 120.28    | 119.9(2)             | 120.4(2)  | 120.22               | 120.0(1)             | 120.4(1)  | 119.72               |
| C(4)–C(5)–C(6)      | 119.0(4)             | 119.06    | 119.4(2)             | 119.0(2)  | 119.05               | 119.3(1)             | 118.7(1)  | 119.24               |
| C(5)–C(6)–N(1)      | 120.1(3)             | 118.77    | 119.6(2)             | 119.9(2)  | 119.26               | 119.5(1)             | 119.9(1)  | 119.39               |
| C(6)–N(1)–C(2)      | 121.9(3)             | 124.00    | 122.4(2)             | 122.5(2)  | 123.11               | 122.7(1)             | 122.8(1)  | 120.00               |
| N(1)–C(2)–C(7)      | 115.8(3)             | 113.88    | –                    | –         | –                    | –                    | –         | –                    |
| C(3)–C(2)–C(7)      | 125.0(4)             | 126.73    | –                    | –         | –                    | –                    | –         | –                    |
| C(2)–C(3)–C(7)      | –                    | –         | 120.4(2)             | 119.1(1)  | 119.11               | –                    | –         | –                    |
| C(4)–C(3)–C(7)      | –                    | –         | 121.0(2)             | 122.4(2)  | 122.15               | –                    | –         | –                    |
| C(3)–C(4)–C(7)      | –                    | –         | –                    | –         | –                    | 122.6(1)             | 122.3(1)  | 120.14               |
| C(5)–C(4)–C(7)      | –                    | –         | –                    | –         | –                    | 117.4(1)             | 117.3(1)  | 120.14               |
| C(2)–C(7)–O(1)      | 117.1(3)             | 115.67    | –                    | –         | –                    | –                    | –         | –                    |
| C(2)–C(7)–O(2)      | 115.0(3)             | 112.45    | –                    | –         | –                    | –                    | –         | –                    |
| C(3)–C(7)–O(1)      | –                    | –         | 122.1(2)             | 120.8(2)  | 114.28               | –                    | –         | –                    |
| C(3)–C(7)–O(2)      | –                    | –         | 112.7(1)             | 113.7(2)  | 114.71               | –                    | –         | –                    |
| C(4)–C(7)–O(1)      | –                    | –         | –                    | –         | –                    | 118.2(1)             | 118.9(1)  | 114.50               |
| C(4)–C(7)–O(2)      | –                    | –         | –                    | –         | –                    | 115.6(1)             | 115.1(1)  | 114.50               |
| O(1)–C(7)–O(2)      | 127.8(3)             | 131.88    | 125.1(2)             | 125.5(2)  | 131.01               | 126.2(1)             | 126.1(1)  | 131.00               |
| C(11)–C(12)–C(13)   | 93.0(3)              | 92.84     | 93.4(1)              | 93.4(1)   | 92.84                | 93.6(1)              | 93.9(1)   | 92.82                |
| C(12)–C(13)–C(14)   | 87.6(3)              | 87.11     | 89.1(1)              | 89.4(1)   | 87.17                | 89.0(1)              | 89.1(1)   | 87.18                |
| C(13)–C(14)–C(11)   | 87.4(3)              | 87.11     | 88.3(1)              | 87.8(1)   | 87.17                | 88.0(1)              | 87.9(1)   | 87.18                |
| C(14)–C(11)–C(12)   | 92.0(3)              | 92.94     | 89.3(1)              | 89.4(1)   | 92.81                | 89.3(1)              | 89.2(1)   | 92.82                |
| C(12)–C(11)–O(11)   | 137.8(4)             | 138.27    | 135.4(2)             | 136.4(2)  | 138.24               | 136.9(1)             | 136.7(1)  | 138.23               |
| C(14)–C(11)–O(11)   | 130.2(3)             | 128.79    | 135.3(2)             | 134.2(2)  | 128.95               | 133.8(1)             | 134.1(1)  | 128.94               |
| C(11)–C(12)–O(12)   | 137.3(4)             | 132.38    | 135.7(1)             | 135.6(2)  | 138.22               | 135.4(1)             | 135.0(1)  | 133.23               |
| C(13)–C(12)–O(12)   | 129.7(3)             | 128.79    | 130.9(2)             | 130.9(2)  | 128.96               | 131.0(1)             | 131.1(1)  | 128.94               |
| C(12)–C(13)–O(13)   | 137.1(3)             | 135.46    | 135.7(2)             | 135.6(2)  | 135.47               | 136.4(1)             | 136.2(1)  | 135.47               |

|                         |                     |         |                     |           |                     |                     |           |                     |
|-------------------------|---------------------|---------|---------------------|-----------|---------------------|---------------------|-----------|---------------------|
| C(14)–C(13)–O(13)       | 135.3(3)            | 137.42  | 135.2(2)            | 135.0(2)  | 137.36              | 136.2(1)            | 134.7(1)  | 137.35              |
| C(11)–C(14)–O(14)       | 137.0(3)            | 135.45  | 135.8(2)            | 136.3(2)  | 135.48              | 136.8(1)            | 137.0(1)  | 135.47              |
| C(13)–C(14)–O(14)       | 135.6(3)            | 137.45  | 135.9(2)            | 135.8(2)  | 137.35              | 135.2(1)            | 135.1(1)  | 135.35              |
| MAD                     | <sup>a)</sup> 1.145 |         | <sup>b)</sup> 0.491 |           | <sup>c)</sup> 1.671 | <sup>d)</sup> 0.304 |           | <sup>e)</sup> 1.740 |
| <i>Torsion angles</i>   |                     |         |                     |           |                     |                     |           |                     |
| N(1)–C(2)–C(3)–C(4)     | 1.0(6)              | 0.02    | –1.5(2)             | 1.6(2)    | 0.01                | –0.1(2)             | 0.6(2)    | –0.005              |
| C(2)–C(3)–C(4)–C(5)     | –1.1(8)             | –0.02   | 0.6(2)              | –1.1(3)   | 0.01                | 0.2(2)              | –0.6(2)   | 0.002               |
| C(3)–C(4)–C(5)–C(6)     | 0.5(9)              | 0.02    | 0.6(2)              | –0.2(3)   | –0.02               | –0.6(2)             | 0.4(2)    | 0.003               |
| C(4)–C(5)–C(6)–N(1)     | 0.3(7)              | –0.001  | –1.0(2)             | 1.0(3)    | 0.01                | 1.1(2)              | –0.1(2)   | –0.005              |
| C(5)–C(6)–N(1)–C(2)     | –0.4(6)             | –0.005  | 0.2(2)              | –0.5(3)   | 0.02                | –1.1(2)             | 0.1(2)    | 0.002               |
| C(6)–N(1)–C(2)–C(3)     | –0.3(6)             | –0.004  | 1.1(2)              | –0.8(2)   | –0.02               | 0.6(2)              | –0.3(2)   | 0.003               |
| C(6)–N(1)–C(2)–C(7)     | –179.4(3)           | –179.99 | –                   | –         | –                   | –                   | –         | –                   |
| C(4)–C(3)–C(2)–C(7)     | –179.9(4)           | –179.99 | –                   | –         | –                   | –                   | –         | –                   |
| N(1)–C(2)–C(3)–C(7)     | –                   | –       | 177.7(1)            | –178.2(2) | –179.99             | –                   | –         | –                   |
| C(5)–C(4)–C(3)–C(7)     | –                   | –       | –178.6(2)           | 178.7(2)  | –179.99             | –                   | –         | –                   |
| C(2)–C(3)–C(4)–C(7)     | –                   | –       | –                   | –         | –                   | –179.4(1)           | 179.1(1)  | –180.00             |
| C(6)–C(5)–C(4)–C(7)     | –                   | –       | –                   | –         | –                   | 179.0(1)            | –179.4(1) | –180.00             |
| N(1)–C(2)–C(7)–O(1)     | –179.4(3)           | 179.59  | –                   | –         | –                   | –                   | –         | –                   |
| N(1)–C(2)–C(7)–O(2)     | 0.6(5)              | –0.36   | –                   | –         | –                   | –                   | –         | –                   |
| C(3)–C(2)–C(7)–O(1)     | 1.5(6)              | –0.40   | –                   | –         | –                   | –                   | –         | –                   |
| C(3)–C(2)–C(7)–O(2)     | –178.4(4)           | 179.65  | –                   | –         | –                   | –                   | –         | –                   |
| C(2)–C(3)–C(7)–O(1)     | –                   | –       | –178.0(2)           | 6.4(2)    | –0.45               | –                   | –         | –                   |
| C(2)–C(3)–C(7)–O(2)     | –                   | –       | 1.4(2)              | –173.9(2) | 179.54              | –                   | –         | –                   |
| C(4)–C(3)–C(7)–O(1)     | –                   | –       | 1.2(3)              | –173.5(2) | 179.55              | –                   | –         | –                   |
| C(4)–C(3)–C(7)–O(2)     | –                   | –       | –179.5(2)           | 6.3(2)    | –0.46               | –                   | –         | –                   |
| C(3)–C(4)–C(7)–O(1)     | –                   | –       | –                   | –         | –                   | –178.0(1)           | –177.9(1) | 179.87              |
| C(3)–C(4)–C(7)–O(2)     | –                   | –       | –                   | –         | –                   | 2.5(2)              | 1.6(2)    | –0.13               |
| C(5)–C(4)–C(7)–O(1)     | –                   | –       | –                   | –         | –                   | 2.4(2)              | 1.8(2)    | –0.13               |
| C(5)–C(4)–C(7)–O(2)     | –                   | –       | –                   | –         | –                   | –177.1(1)           | –178.7(1) | 179.87              |
| C(11)–C(12)–C(13)–C(14) | –0.3(3)             | 0.28    | –0.2(1)             | 0.4(1)    | 0.17                | –1.1(1)             | –0.7(1)   | 0.02                |
| C(12)–C(13)–C(14)–C(11) | 0.2(3)              | –0.26   | 0.2(1)              | –0.4(1)   | –0.16               | 1.1(1)              | 0.7(1)    | –0.02               |
| C(13)–C(14)–C(11)–C(12) | –0.3(3)             | 0.28    | –0.2(1)             | 0.4(1)    | 0.17                | –1.1(1)             | –0.7(1)   | 0.02                |
| C(14)–C(11)–C(12)–C(13) | 0.3(3)              | –0.29   | 0.2(1)              | –0.4(1)   | –0.18               | 1.1(1)              | 0.7(1)    | –0.02               |
| C(13)–C(12)–C(11)–O(11) | –179.1(5)           | 179.75  | –179.0(2)           | 179.5(2)  | 179.86              | –177.6(2)           | –178.2(2) | 179.93              |
| C(13)–C(14)–C(11)–O(11) | 179.2(5)            | –179.75 | 179.0(2)            | –179.6(2) | –179.86             | 177.7(2)            | 178.3(2)  | –179.98             |
| O(11)–C(11)–C(12)–O(12) | 1.2(8)              | –0.20   | 0.0(4)              | 0.1(4)    | –0.12               | 2.3(3)              | 0.2(3)    | –0.03               |
| O(11)–C(11)–C(14)–O(14) | –0.8(8)             | 0.33    | –0.1(4)             | 2.1(4)    | 0.18                | –1.6(3)             | –1.8(3)   | 0.03                |
| C(14)–C(11)–C(12)–O(12) | –179.5(5)           | 179.76  | 179.2(2)            | –179.8(2) | 179.85              | 179.0(2)            | 179.1(2)  | 179.98              |
| C(14)–C(13)–C(12)–O(12) | 179.5(5)            | –179.76 | –179.2(2)           | 179.8(2)  | –179.85             | –179.0(2)           | –179.2(2) | –179.98             |
| O(12)–C(12)–C(13)–O(13) | –0.8(8)             | 0.32    | –0.5(3)             | –0.9(3)   | 0.20                | –2.0(3)             | 0.3(3)    | 0.03                |
| C(11)–C(12)–C(13)–O(13) | 179.4(5)            | –179.63 | 178.5(2)            | 179.7(2)  | –179.78             | 177.9(2)            | 178.8(2)  | –179.98             |
| C(11)–C(14)–C(13)–O(13) | –179.5(5)           | 179.65  | –178.5(2)           | –179.7(2) | 179.79              | –178.0(2)           | –178.9(2) | 179.98              |
| O(13)–C(13)–C(14)–O(14) | 0.5(8)              | –0.44   | 0.6(4)              | –1.3(4)   | –0.25               | 1.4(3)              | 1.2(3)    | –0.03               |
| C(12)–C(11)–C(14)–O(14) | 179.8(5)            | –179.64 | –179.3(2)           | –178.0(2) | –179.79             | 179.6(2)            | 179.2(2)  | –179.98             |
| C(12)–C(13)–C(14)–O(14) | –179.8(5)           | 179.65  | 179.3(2)            | 178.0(2)  | 179.80              | –179.6(2)           | –179.2(2) | 179.98              |

Mean absolute difference, MAD =  $1/n \sum |d_{\text{exp}} - d_{\text{calc}}|$ ; d – geometrical parameter; n – number of data; MAD between bond lengths or bond angles, respectively of <sup>a)</sup> **1** and **1a**, <sup>b)</sup> **2**<sup>\*</sup> and **2**, <sup>c)</sup> **2**<sup>\*</sup> and **2a**, <sup>d)</sup> **3**<sup>\*</sup> and **3**, <sup>e)</sup> **3**<sup>\*</sup> and **3a**

\* The atoms of one from two independent hydrogen squarate monoanions and pyridinium-carboxylic acid cations in the asymmetric unit of **2** and **3** crystal structures are described by the capital letter A.

**Table S2.** Determined  $\Delta pK_a$  parameters for described pyridine carboxylic acid – squaric acid systems.

| Pyridine carboxylic acid    | $pK_a H^+$ <sup>a)</sup> | $\Delta pK_a$ <sup>b)</sup> |
|-----------------------------|--------------------------|-----------------------------|
| PICA (picolinic acid)       | 1.03                     | 0.31                        |
| NICA (nicotinic acid)       | 1.96                     | 1.37                        |
| ISONICA (isonicotinic acid) | 1.57                     | 0.98                        |

a)  $pK_a$ (protonated base) values calculated by potentiometric measurements by B. García et al. ( $pK_1$  parameter in this work)<sup>1</sup>; b)  $\Delta pK_a = pK_a$ (protonated base) –  $pK_a$ (acid)<sup>2</sup>. The squaric acid  $pK_{a1}$  value of 0.59 was taken into account for the calculation of  $\Delta pK_a$  parameter<sup>3</sup>.

## References

- 1 B. García, S. Ibeas and J. M. Leal, *J. Phys. Org. Chem.*, 1996, **9**, 593–597.
- 2 A. J. Cruz-Cabeza, *CrystEngComm*, 2012, **14**, 6362–6365.
- 3 R. I. Gelb, *Anal. Chem.*, 1971, **43**, 1110–1113.

**Table S3.** Summary of the contact contributions in the Hirshfeld surface area of the asymmetric units in crystals of **1**, **2**, and **3**. The two dominant interactions are marked in bold.

|          | O...H / %   | C...H / %   | N...H / % | others / % | Sum of top two interactions / % |
|----------|-------------|-------------|-----------|------------|---------------------------------|
| <b>1</b> | <b>48</b>   | <b>16.6</b> | 0.3       | 35.1       | 64.6                            |
| <b>2</b> | <b>48</b>   | <b>17.4</b> | 0.9       | 33.7       | 65.4                            |
| <b>3</b> | <b>41.5</b> | <b>19.3</b> | 1.1       | 38.1       | 60.8                            |

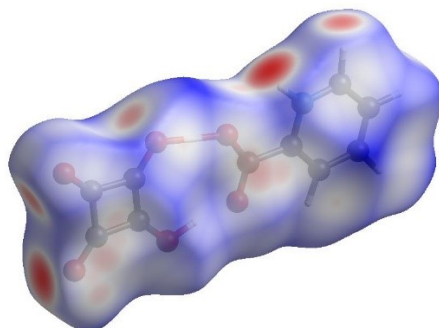

**Fig. S1** The Hirshfeld surface of asymmetric unit of **1** generated using  $d_{\text{norm}}$  parameters in the range -0.5914 – 1.1053.

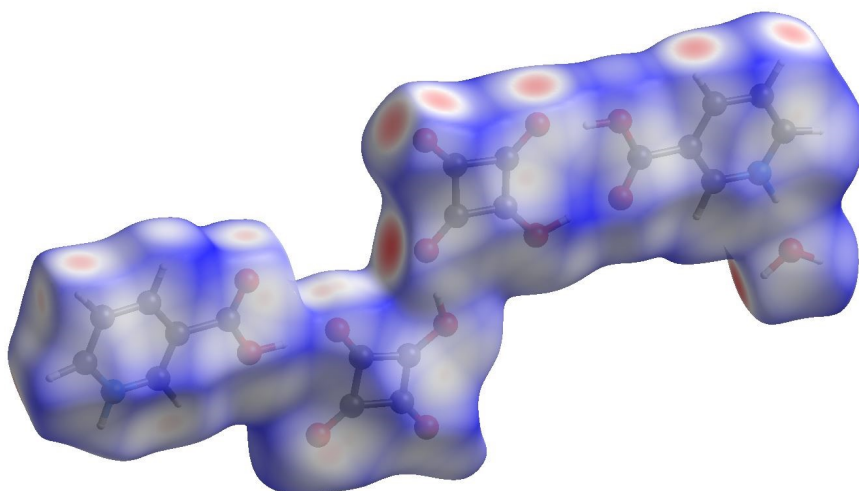

**Fig. S2** The Hirshfeld surface of asymmetric unit of **2** generated using  $d_{\text{norm}}$  parameters in the range -0.7245 – 0.9707.

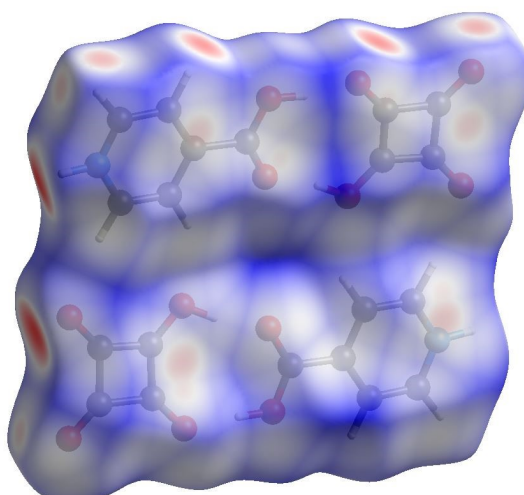

**Fig. S3** The Hirshfeld surface of asymmetric unit of **3** generated using  $d_{\text{norm}}$  parameters in the range -0.7530 – 0.9507.

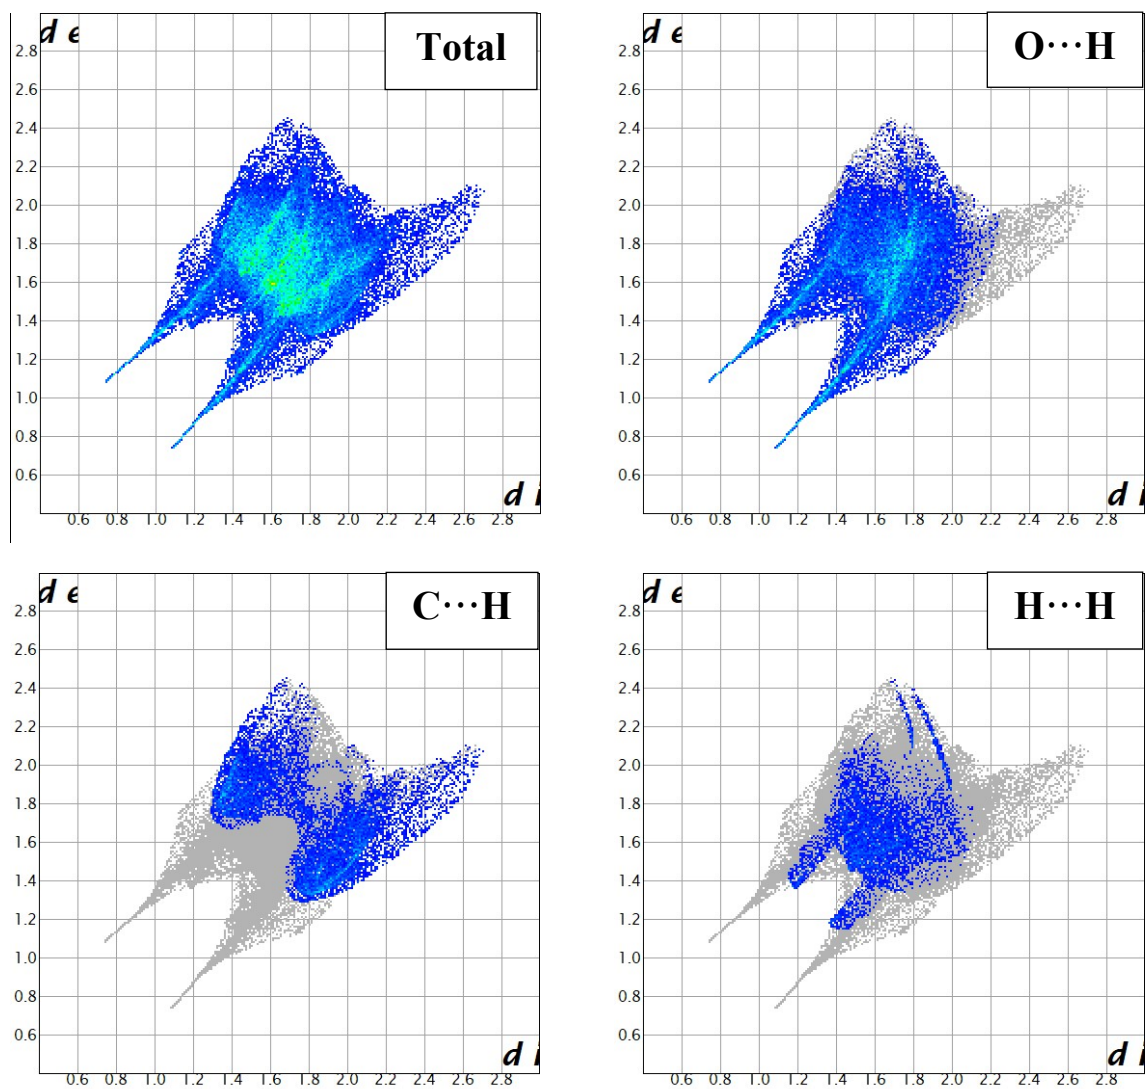

Fig. S4 2D fingerprint plots of asymmetric unit in crystal of pyridinium-2-carboxylate squaric acid (1).

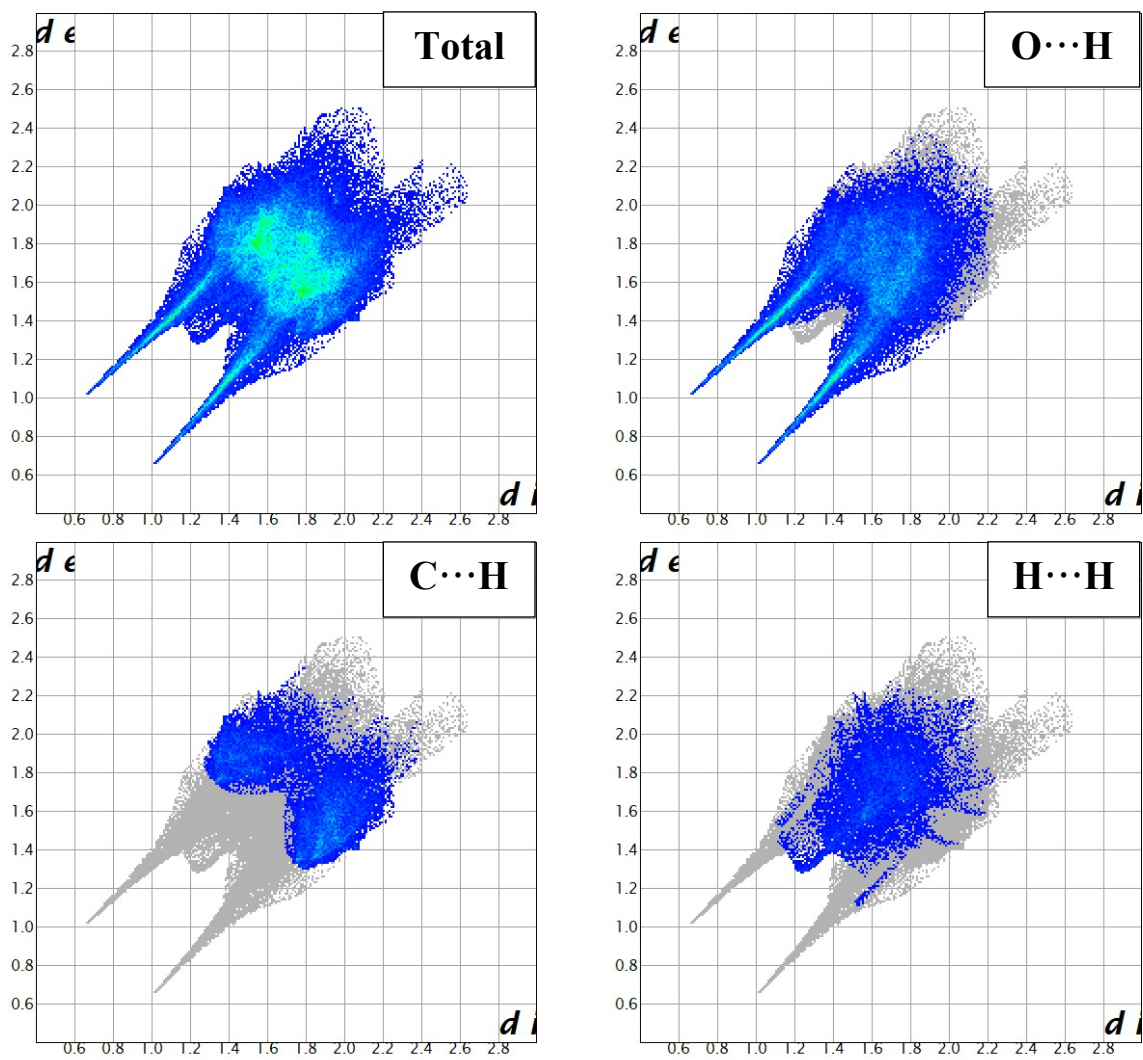

Fig. S5 2D fingerprint plots of asymmetric unit in crystal of pyridinium-3-carboxylic acid squaric acid hemihydrate (2).

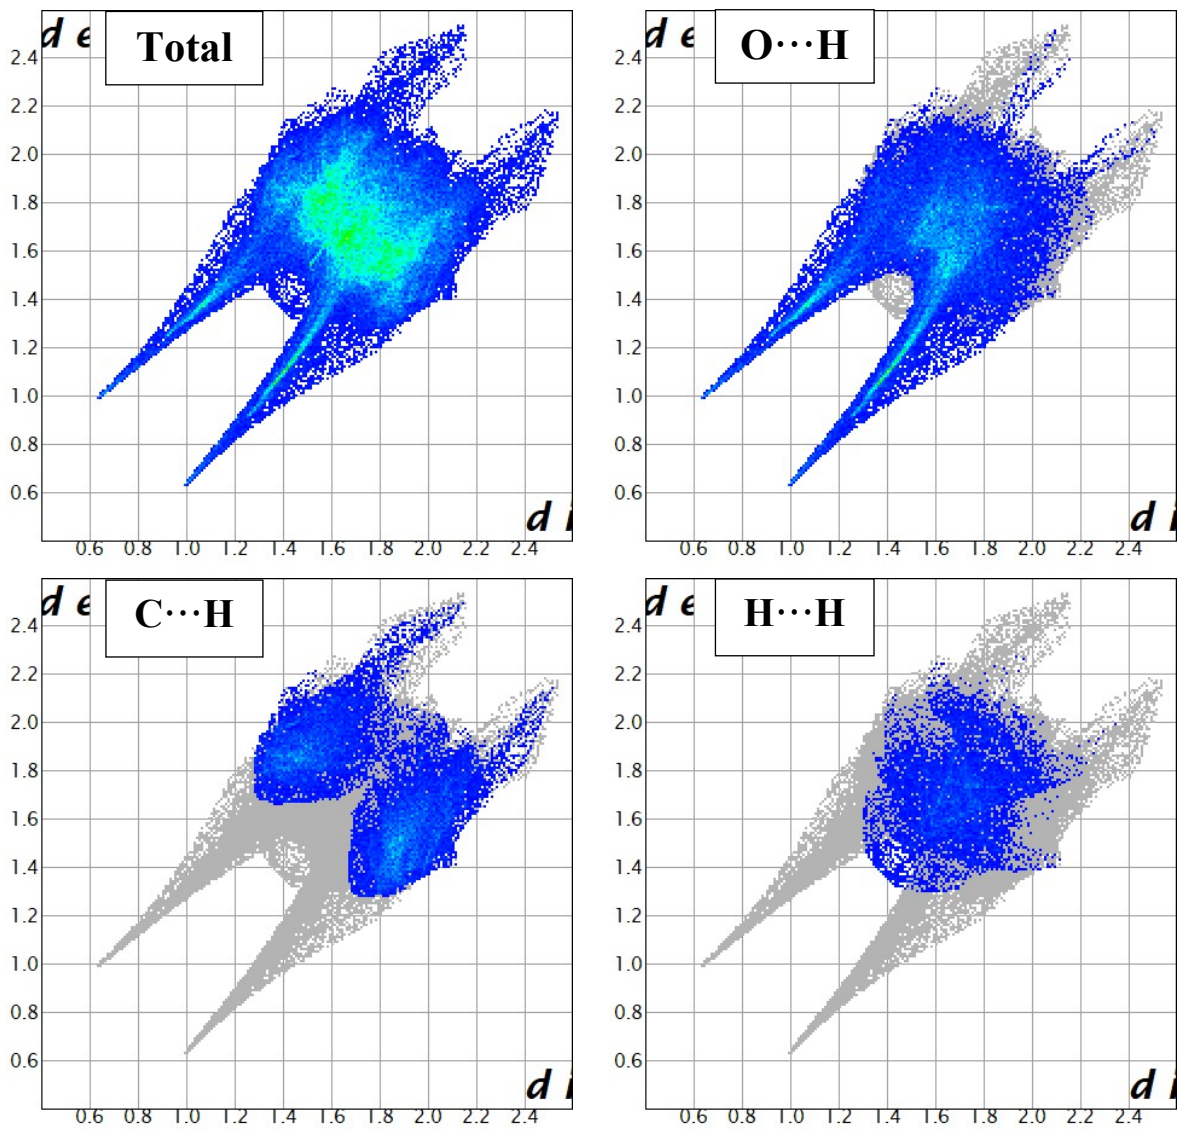

Fig. S6 2D fingerprint plots of asymmetric unit in crystal of pyridinium-4-carboxylic acid squaric acid (3).

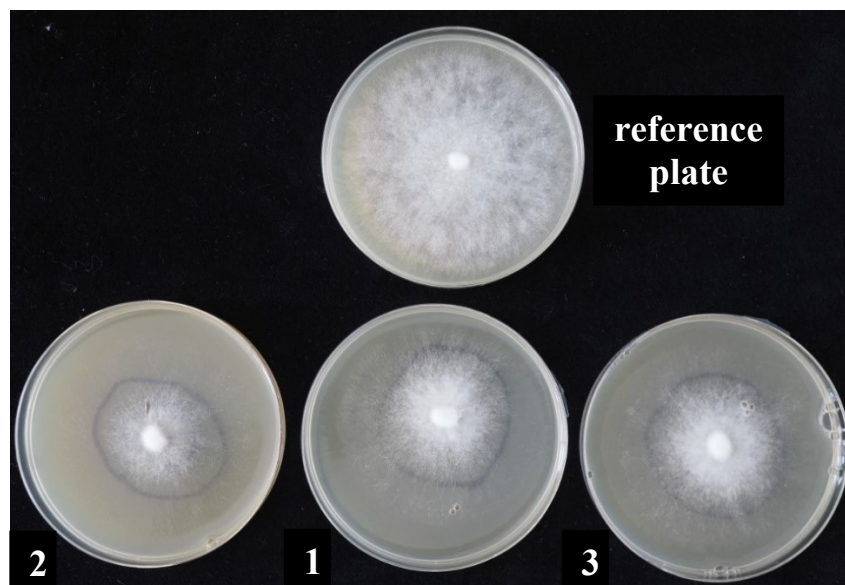

**Fig. S7** The experimental determination of  $ED_{50}$  of the fungistatic properties with *Poria placenta* fungus for pyridinium-2-carboxylate squaric acid (1), pyridinium-3-carboxylic acid hydrogen squarate hemihydrate (2), pyridinium-4-carboxylic acid hydrogen squarate (3).
